# Supplementary material for: Examining Negative Emotional Symptoms and Psychological Wellbeing of Australian Sport Officials
Source: Int J Environ Res Public Health. 2020 Nov 9;17(21):8265. doi: 10.3390/ijerph17218265 (PMC7664859; doi:10.3390/ijerph17218265)
Supplement: Supplementary file 1 [file ijerph-17-08265-s001.pdf]

**Supplementary Table 1.** Summary of study variables, measures and example survey questions

| Variables                          | Measure                                                               | Example questions                                                                                               |
|------------------------------------|-----------------------------------------------------------------------|-----------------------------------------------------------------------------------------------------------------|
| <i>Demographics</i>                | Gender                                                                | What is your gender?                                                                                            |
|                                    | Age group (years)                                                     | How old are you?                                                                                                |
|                                    | Relationship status                                                   | What is your marital status?                                                                                    |
| <i>Officiating</i>                 | Highest level of education                                            | What is your highest level of education?                                                                        |
|                                    | Sport(s) officiated                                                   | What sport/s do you officiate in?                                                                               |
|                                    | Current officiating role                                              | What is your current role in [sport]?                                                                           |
|                                    | Level of competition officiated (for each sport)                      | What level of competition do you usually officiate [sport] in?                                                  |
|                                    | Age groups usually officiated                                         | What age group/s do you usually officiate?                                                                      |
|                                    | Gender usually officiated                                             | What group/s do you usually officiate?                                                                          |
|                                    | Nature of paid engagement                                             | What is the nature of your officiating?                                                                         |
|                                    | Officiating experience (years)                                        | How many years have you been an official for?                                                                   |
| <i>Workload</i>                    | Areas of Worklife Scale (AWS) – Workload Scale                        | I work intensely for prolonged periods of time.<br>I have enough time to do what is important.                  |
| <i>Control</i>                     | Areas of Worklife Scale (AWS) – Control Scale                         | I can influence management to obtain equipment and space I need.<br>I have professional autonomy / independence |
| <i>Negative Emotional Symptoms</i> | Derived from Depression, Anxiety and Stress Scale (DASS-21)           |                                                                                                                 |
|                                    | - Depression scale                                                    | I couldn't seem to experience any positive feelings at all.                                                     |
|                                    | - Anxiety scale                                                       | I felt like I had nothing to look forward to.<br>I was aware of dryness in my mouth.                            |
|                                    | - Stress scale                                                        | I experienced breathing difficulty.<br>I found it hard to wind down.<br>I tended to over-react to situations.   |
| <i>Psychological Wellbeing</i>     | Warwick-Edinburgh Mental Wellbeing Scale (WEMWBS) – total score items | I've been feeling relaxed.<br>I've been feeling good about myself.                                              |
